# Supplementary material for: Identification of Crucial lncRNAs for Luminal A Breast Cancer through RNA Sequencing
Source: Hindawi journal article supplement (doi:10.1155/2022/6577942), 2022-06-02
Supplement: f1 [file 6577942.f1.zip]

| mRNAsig   | lncRNAsig  |
|-----------|------------|
| WDR62     | LINC01697  |
| POC1A     | LINC01697  |
| AC091057. | LINC01697  |
| TINCR     | LINC01697  |
| KIF18A    | LINC01697  |
| EGLN3     | LINC01697  |
| C19orf48  | LINC01697  |
| CORO2A    | LINC01697  |
| EXO1      | AC097534.1 |
| AGT       | AC097534.1 |
| GJB2      | AC097534.1 |
| CENPF     | AC097534.1 |
| FAM111B   | AC097534.1 |
| CDCA5     | AC097534.1 |
| UHRF1     | AC097534.1 |
| CFB       | AC097534.1 |
| UBE2T     | AC097534.1 |
| CDC6      | AC097534.1 |
| NAT1      | AC097534.1 |
| TLCD1     | AC097534.1 |
| CDCA8     | AC097534.1 |
| DIO2      | AC097534.1 |
| BGN       | AC097534.1 |
| CKS2      | AC097534.1 |
| HIST3H2BE | AC097534.1 |
| ECT2      | AC097534.1 |
| DNA2      | AC097534.1 |
| ADGRB2    | AC097534.1 |
| SLC1A1    | AC097534.1 |
| CREB3L1   | AC097534.1 |
| SLC39A6   | AC097534.1 |
| CDC7      | AC097534.1 |
| SULF1     | AC097534.1 |
| IRF7      | AC097534.1 |
| ZNHIT2    | AC097534.1 |
| HIST2H2AA | AC097534.1 |
| TIMP1     | AC097534.1 |
| SMC4      | AC097534.1 |
| DDX58     | AC097534.1 |
| SEPHS2    | AC097534.1 |
| CCNF      | AC097534.1 |
| F7        | AC108477.1 |
| CATSPERB  | LINC00968  |
| PAX9      | LINC00968  |
| MFSD2A    | LINC00968  |
| PPFIA4    | LINC00968  |
| POC1A     | LINC00968  |
| TMC5      | LINC00968  |
| CHEK1     | LINC00968  |
| PAFAH1B3  | LINC00968  |

|            |             |
|------------|-------------|
| C19orf48   | LINC00968   |
| HIST1H1D   | LINC00968   |
| PASK       | LINC00968   |
| RGL3       | LINC00968   |
| SDC1       | LINC00968   |
| MDK        | LINC00968   |
| HELLS      | LINC00968   |
| SLC37A1    | LINC00968   |
| CORO2A     | LINC00968   |
| FANCD2     | LINC00968   |
| MOCS1      | AC055854. 1 |
| FAM49A     | AC055854. 1 |
| HPX        | LINC02202   |
| PAX9       | LINC02202   |
| MFSD2A     | LINC02202   |
| PPFIA4     | LINC02202   |
| DNAH14     | LINC02202   |
| HIST1H2BHL | LINC02202   |
| SERPINE2   | LINC02202   |
| GINS2      | LINC02202   |
| PAFAH1B3   | LINC02202   |
| PAQR4      | LINC02202   |
| HIST1H1D   | LINC02202   |
| TMEM97     | LINC02202   |
| HIST1H2BGL | LINC02202   |
| PASK       | LINC02202   |
| RGL3       | LINC02202   |
| MDK        | LINC02202   |
| SLC12A8    | LINC02202   |
| HELLS      | LINC02202   |
| SLC37A1    | LINC02202   |
| CORO2A     | LINC02202   |
| TFF3       | AC110597. 1 |
| HIST1H2AI  | AC110597. 1 |
| HIST1H2AM  | AC110597. 1 |
| HIST1H3I   | AC110597. 1 |
| HIST1H2BE  | AC110597. 1 |
| HIST1H3D   | AC110597. 1 |
| RFC5       | AC110597. 1 |
| ZNF552     | AC110597. 1 |
| PPFIA4     | AC110597. 1 |
| ZNF681     | AC110597. 1 |
| PCSK6      | AC110597. 1 |
| ZNF239     | AC110597. 1 |
| SHMT2      | AC110597. 1 |
| RCC1       | AC110597. 1 |
| CDT1       | TRHDE-AS1   |
| SERPINE2   | TRHDE-AS1   |
| TMEM97     | TRHDE-AS1   |
| KCNB1      | AP000439. 2 |
| RNF150     | AP000439. 2 |

|           |            |
|-----------|------------|
| SNCG      | AP000439.2 |
| SPRY2     | AP000439.2 |
| ADAMTS5   | AP000439.2 |
| CHL1      | AP000439.2 |
| CLIP4     | AP000439.2 |
| PLA2R1    | AP000439.2 |
| PLEKHM3   | AP000439.2 |
| QKI       | AP000439.2 |
| LDHB      | AL139220.2 |
| DIAPH2    | AL139220.2 |
| AKR1C1    | AL133373.2 |
| KLF9      | HOXC-AS3   |
| PRCD      | LINC00473  |
| COLEC12   | LINC00473  |
| WASF3     | AP005121.1 |
| LDHB      | AP005121.1 |
| PAX9      | LINC01230  |
| TMC5      | LINC01230  |
| ZG16B     | LINC01230  |
| CAPS      | LINC01230  |
| GINS2     | LINC01230  |
| PASK      | LINC01230  |
| SDC1      | LINC01230  |
| MDK       | LINC01230  |
| MSH6      | LINC01230  |
| CORO2A    | LINC01230  |
| FANCD2    | LINC01230  |
| NAT8L     | AL356740.2 |
| TACR1     | AL139412.1 |
| STBD1     | AC106028.2 |
| ETFB      | AC106028.2 |
| MYBL2     | AP001528.2 |
| ORC1      | AP001528.2 |
| MUC5B     | AP001528.2 |
| MEX3A     | AP001528.2 |
| CDT1      | AP001528.2 |
| PAX9      | AP001528.2 |
| TMC5      | AP001528.2 |
| PAFAH1B3  | AP001528.2 |
| HIST1H2BG | AP001528.2 |
| HIST1H2AK | AP001528.2 |
| MDK       | AP001528.2 |
| HELLS     | AP001528.2 |
| SLC37A1   | AP001528.2 |
| RAI14     | VLDLR-AS1  |
| CFD       | AL354707.1 |
| CD300LG   | AL354707.1 |
| ALDH1L1   | AL354707.1 |
| ITIH5     | AL354707.1 |
| RDH5      | AL354707.1 |
| MYZAP     | AL354707.1 |

|          |            |
|----------|------------|
| PQLC2L   | AL354707.1 |
| CACNA2D1 | AL354707.1 |
| BTNL9    | AL354707.1 |
| CAVIN2   | AL354707.1 |
| SAA2     | AL354707.1 |
| KLF15    | AL354707.1 |
| TNS1     | AL354707.1 |
| DDR2     | AL354707.1 |
| MCAM     | AL354707.1 |
| FIGN     | AL354707.1 |
| DENND2A  | AL354707.1 |
| MT1X     | AL354707.1 |
| GSN      | AL354707.1 |
| DEPP1    | AL354707.1 |
| PALMD    | AL354707.1 |
| SCN9A    | AL354707.1 |
| RSP03    | AL354707.1 |
| CRYAB    | AL354707.1 |
| CKMT2    | AL354707.1 |
| KBTBD11  | AL354707.1 |
| DSEL     | AL354707.1 |
| RGCC     | AL354707.1 |
| CHST3    | AL354707.1 |
| GRIN2B   | AL354707.1 |
| TENM1    | AL354707.1 |
| CAVIN1   | AL354707.1 |
| PELI2    | AL354707.1 |
| PEAR1    | AL354707.1 |
| NMT2     | AL354707.1 |
| TGFBR2   | AL354707.1 |
| MOB3B    | AL354707.1 |
| FAM171A1 | AL354707.1 |
| GNAL     | AL354707.1 |
| PDGFD    | AL354707.1 |
| STAT5A   | AL354707.1 |
| IRS2     | AL354707.1 |
| KAT2B    | AL354707.1 |
| SATB1    | AL354707.1 |
| CDC42BPA | AL354707.1 |
| PLSCR4   | AL354707.1 |
| STXBP1   | AL354707.1 |
| SH3D19   | AL354707.1 |
| CNKSR2   | AL354707.1 |
| EZH1     | AL354707.1 |
| CREBRF   | AL354707.1 |
| ZDHHC2   | AL354707.1 |
| FOXO1    | AL354707.1 |
| NR1D2    | AL354707.1 |
| ADRB1    | MRPS30-DT  |
| VIT      | MRPS30-DT  |
| HJURP    | AC020907.2 |

|            |            |
|------------|------------|
| STIL       | AC020907.2 |
| TPRN       | AC020907.2 |
| MTURN      | AC074135.1 |
| RELN       | AC074135.1 |
| PPP1R15A   | AC074135.1 |
| CSRP2      | AC074135.1 |
| TMEM64     | AC074135.1 |
| RPS6KA3    | AC074135.1 |
| SOD2       | AC074135.1 |
| ADRA1A     | AC068669.1 |
| HS6ST3     | LINC01140  |
| CD24       | LINC01140  |
| MEX3A      | LINC01140  |
| PAX9       | LINC01140  |
| MFSD2A     | LINC01140  |
| SAPCD2     | LINC01140  |
| RAPGEFL1   | LINC01140  |
| HIST1H2BGL | LINC01140  |
| TMEM132A   | LINC01140  |
| DHRS13     | LINC01140  |
| HELLS      | LINC01140  |
| SLC37A1    | LINC01140  |
| HIST1H3G   | AP001528.3 |
| HIST1H2AIA | AP001528.3 |
| HIST1H3F   | AP001528.3 |
| BRIP1      | AP001528.3 |
| PPFIA4     | AP001528.3 |
| DNAH14     | AP001528.3 |
| SERPINE2   | AP001528.3 |
| PAFAH1B3   | AP001528.3 |
| RGL3       | AP001528.3 |
| DNAAF1     | LINC01239  |
| AGR2       | LINC01239  |
| B4GALNT4   | LINC01239  |
| C4B        | LINC01239  |
| C4A        | LINC01239  |
| DNAH5      | LINC01239  |
| MUC1       | LINC01239  |
| UBXN10     | LINC01239  |
| DNAH7      | LINC01239  |
| HIST1H2BMA | AC134043.2 |
| CDT1       | AC134043.2 |
| DNAH14     | AC134043.2 |
| SERPINE2   | AC134043.2 |
| PAFAH1B3   | AC134043.2 |
| HIST1H1D   | AC134043.2 |
| TMEM97     | AC134043.2 |
| HIST1H2AE  | AC134043.2 |
| HIST1H2BG  | AC134043.2 |
| HELLS      | AC134043.2 |
| C19orf48   | AC093278.2 |

|          |            |
|----------|------------|
| CLEC14A  | EIPRI-IT1  |
| ERG      | EIPRI-IT1  |
| SHTN1    | AC024909.2 |
| TMEM100  | AC144450.1 |
| P2RY12   | AC144450.1 |
| LRRN4CL  | AC144450.1 |
| DSEL     | AC144450.1 |
| CD248    | AC144450.1 |
| EFEMP1   | AC144450.1 |
| ADRB2    | AC144450.1 |
| CCND2    | AC144450.1 |
| ITPRIP   | AC144450.1 |
| C19orf48 | LINC00598  |
| CYB561   | LINC00598  |
| MYC      | AC079310.1 |
| TWIST2   | AC159540.2 |
| C19orf12 | AC159540.2 |
| KLF4     | AC159540.2 |
| MEOX1    | AC159540.2 |
| TENM1    | AC159540.2 |
| CAVIN1   | AC159540.2 |
| TMTC1    | AC159540.2 |
| STARD9   | AC159540.2 |
| PROS1    | AC159540.2 |
| CDH23    | AC159540.2 |
| ADAMTS1  | AC159540.2 |
| CDC42BPA | AC159540.2 |
| SYNE1    | AC159540.2 |
| CNKSR2   | AC159540.2 |
| PDE8B    | AC013652.1 |
| VLDLR    | AC013652.1 |
| RCC1     | AC011379.1 |
| LY6E     | LINC01695  |
| WDR62    | AL356489.2 |
| DNAJA4   | AL356489.2 |
| CNTFR    | AC092919.2 |
| TIMP4    | AP000526.1 |
| TNMD     | AP000526.1 |
| ADH1B    | AP000526.1 |
| DPT      | AP000526.1 |
| PCDH9    | AP000526.1 |
| CLEC3B   | AP000526.1 |
| CMA1     | AP000526.1 |
| GPX3     | AP000526.1 |
| DNASE1L3 | AP000526.1 |
| EBF1     | AP000526.1 |
| ALDH1A1  | AP000526.1 |
| NRN1     | AP000526.1 |
| VWF      | AP000526.1 |
| TXNIP    | AP000526.1 |
| JDP2     | AP000526.1 |

|          |            |
|----------|------------|
| F8       | AP000526.1 |
| KLF2     | AP000526.1 |
| CD302    | AP000526.1 |
| FAM83D   | AC026461.1 |
| HIST1H2A | AC026461.1 |
| MYBL2    | AC026461.1 |
| HIST1H2A | AC026461.1 |
| CDC45    | AC026461.1 |
| ORC1     | AC026461.1 |
| HPX      | AC026461.1 |
| BUB1     | AC026461.1 |
| KIFC1    | AC026461.1 |
| STIL     | AC026461.1 |
| KIF23    | AC026461.1 |
| FBN2     | AC026461.1 |
| HIST1H2B | AC026461.1 |
| BRIP1    | AC026461.1 |
| ANO7     | AC026461.1 |
| AUNIP    | AC026461.1 |
| WDR62    | AC026461.1 |
| DNAH14   | AC026461.1 |
| SERPINE2 | AC026461.1 |
| MCM4     | AC026461.1 |
| TMEM241  | AC026461.1 |
| KDM5B    | AC026461.1 |
| SHMT2    | AC026461.1 |
| FLVCR1   | AC026461.1 |
| NEMP1    | AC026461.1 |
| COL10A1  | FGF14-AS2  |
| C3orf67  | FGF14-AS2  |
| ATG9B    | FGF14-AS2  |
| FREM1    | AC141930.1 |
| COLEC12  | AC141930.1 |
| MYC      | AC141930.1 |
| SLC30A8  | AC007036.3 |
| DNAAF1   | AC007036.3 |
| B4GALNT4 | AC007036.3 |
| DNAH7    | AC007036.3 |
| VEGFB    | DGUOK-AS1  |
| SNTA1    | DGUOK-AS1  |
| NEK7     | DGUOK-AS1  |
| TNIP1    | DGUOK-AS1  |
| ANXA5    | DGUOK-AS1  |
| MYO1C    | DGUOK-AS1  |
| PKMYT1   | LIPE-AS1   |
| HIST1H2B | LIPE-AS1   |
| ZNF726   | LIPE-AS1   |
| TNR      | EMX20S     |
| PRR26    | AC106820.2 |
| MTFR2    | AC132217.1 |
| LIPG     | AC132217.1 |

|          |            |
|----------|------------|
| SELEN01  | AC132217.1 |
| FAM83D   | AC008622.2 |
| RAD51    | AC008622.2 |
| TNFRSF9  | AC008622.2 |
| FAM83D   | AP001816.1 |
| CDKN3    | AP001816.1 |
| CLSPN    | AP001816.1 |
| TICRR    | AP001816.1 |
| CKAP2L   | AP001816.1 |
| MELK     | AP001816.1 |
| DIAPH3   | AP001816.1 |
| PLA2G2D  | AP001816.1 |
| TNFRSF9  | AP001816.1 |
| STK36    | AP001816.1 |
| P4HA3    | LINC01550  |
| DIO2     | LINC01550  |
| C3orf67  | LINC01550  |
| ATG9B    | LINC01550  |
| STK36    | LINC01550  |
| ABCA8    | AL645608.3 |
| PALM     | AL645608.3 |
| MEOX2    | AL645608.3 |
| COLEC12  | AL645608.3 |
| TNS2     | AL645608.3 |
| CAVIN2   | HELLPAR    |
| GHR      | HELLPAR    |
| HSPB6    | HELLPAR    |
| MYOM1    | HELLPAR    |
| SCN9A    | HELLPAR    |
| CRYAB    | HELLPAR    |
| LRRN4CL  | HELLPAR    |
| NLGN1    | HELLPAR    |
| FAM107A  | HELLPAR    |
| DSEL     | HELLPAR    |
| CAVIN1   | HELLPAR    |
| TMTC1    | HELLPAR    |
| EHD2     | HELLPAR    |
| SOX5     | HELLPAR    |
| NDN      | HELLPAR    |
| GNAL     | HELLPAR    |
| PDZRN3   | HELLPAR    |
| ATF3     | HELLPAR    |
| IRS2     | HELLPAR    |
| RBMS3    | HELLPAR    |
| ADAMTS1  | HELLPAR    |
| CDC42BPA | HELLPAR    |
| PLSCR4   | HELLPAR    |
| PLPP1    | HELLPAR    |
| SMOC1    | GSEC       |
| PQLC2L   | TERC       |
| CXCL2    | TERC       |



|           |            |
|-----------|------------|
| FAM13A    | TERC       |
| CYYR1     | TERC       |
| MAMDC2    | TERC       |
| MOCS1     | TERC       |
| UST       | TERC       |
| TMEM250   | TERC       |
| NAV3      | TERC       |
| TBX15     | AC005162.3 |
| ABCA6     | AC005162.3 |
| CLEC14A   | AC005162.3 |
| GNG11     | AC005162.3 |
| TIE1      | AC005162.3 |
| CXCL12    | AC005162.3 |
| ZEB2      | AC005162.3 |
| CKAP2L    | MANEA-AS1  |
| MELK      | MANEA-AS1  |
| CDCA8     | MANEA-AS1  |
| PLA2G2D   | MANEA-AS1  |
| TNFRSF9   | MANEA-AS1  |
| CHAD      | AC245452.1 |
| FAM83D    | AC048382.5 |
| ORC1      | AC048382.5 |
| HPX       | AC048382.5 |
| BUB1      | AC048382.5 |
| STIL      | AC048382.5 |
| HIST1H2BE | AC048382.5 |
| DNAH14    | AC048382.5 |
| KIAA1549  | AC048382.5 |
| RTKN2     | AC048382.5 |
| MCM4      | AC048382.5 |
| MCM8      | AC048382.5 |
| TMEM241   | AC048382.5 |
| KDM5B     | AC048382.5 |
| SHMT2     | AC048382.5 |
| FLVCR1    | AC048382.5 |
| NEMP1     | AC048382.5 |
| ADSS      | AC048382.5 |
| CKAP4     | AC011247.1 |
| ORC1      | AC020916.1 |
| MTFR2     | AC020916.1 |
| MUC5B     | AC020916.1 |
| DIAPH3    | AC020916.1 |
| LIPG      | AC020916.1 |
| TUSC5     | AC005921.3 |
| NNAT      | AC005921.3 |
| CIDEA     | AC005921.3 |
| HEPACAM   | AC005921.3 |
| SLC19A3   | AC005921.3 |
| FHL1      | AC005921.3 |
| TRHDE     | AC005921.3 |
| GHR       | AC005921.3 |

|                  |            |
|------------------|------------|
| PLAC9            | AC005921.3 |
| CLMP             | AC005921.3 |
| COX7A1           | AC005921.3 |
| RARRES2          | AC005921.3 |
| SVEP1            | AC005921.3 |
| SCN9A            | AC005921.3 |
| HOXA10           | AC005921.3 |
| SYNP0            | AC005921.3 |
| EHD2             | AC005921.3 |
| DHRS3            | AC005921.3 |
| NDN              | AC005921.3 |
| ANGPTL2          | AC005921.3 |
| FADS3            | AC005921.3 |
| PTPRM            | AC005921.3 |
| PLPP1            | AC005921.3 |
| PCBP3            | LINC01814  |
| CXCL11           | LINC01619  |
| CFAP221          | LINC01619  |
| TNFRSF9          | LINC01619  |
| JPT1             | ZNF667-AS1 |
| FAM83D           | AL662844.4 |
| HIST2H3C         | AL662844.4 |
| HIST1H3G         | AL662844.4 |
| HIST1H2AJ        | AL662844.4 |
| HIST2H3A         | AL662844.4 |
| CEP55            | AL662844.4 |
| TOP2A            | AL662844.4 |
| HIST1H1B         | AL662844.4 |
| HIST1H2AIA       | AL662844.4 |
| MYBL2            | AL662844.4 |
| DTL              | AL662844.4 |
| TICRR            | AL662844.4 |
| RAD54L           | AL662844.4 |
| E2F8             | AL662844.4 |
| CDC45            | AL662844.4 |
| HIST1H2AG        | AL662844.4 |
| HIST1H2BL        | AL662844.4 |
| PRC1             | AL662844.4 |
| HIST1H3H         | AL662844.4 |
| KIF23            | AL662844.4 |
| XRCC2            | AL662844.4 |
| BRIP1            | AL662844.4 |
| SLC6A9           | AL662844.4 |
| PLA2G2D          | AL662844.4 |
| AUNIP            | AL662844.4 |
| CENPK            | AL662844.4 |
| HIST1H2BIA       | AL662844.4 |
| HIST1H2BCMIR22HG |            |
| PBK              | MIR222HG   |
| CDC20            | MIR222HG   |
| DEPDC1           | MIR222HG   |

|           |            |
|-----------|------------|
| IQGAP3    | MIR222HG   |
| HJURP     | MIR222HG   |
| HIST1H2AL | MIR222HG   |
| CENPF     | MIR222HG   |
| UHRF1     | MIR222HG   |
| CDK1      | MIR222HG   |
| HIST1H3F  | MIR222HG   |
| CDC45     | MIR222HG   |
| MELK      | MIR222HG   |
| HIST1H2AG | MIR222HG   |
| CDC6      | MIR222HG   |
| KIFC1     | MIR222HG   |
| CDCA8     | MIR222HG   |
| PRC1      | MIR222HG   |
| HIST1H3H  | MIR222HG   |
| KIF23     | MIR222HG   |
| FBN2      | MIR222HG   |
| AUNIP     | MIR222HG   |
| HIST1H3D  | MIR222HG   |
| ECT2      | MIR222HG   |
| PLK1      | MIR222HG   |
| RAD51AP1  | MIR222HG   |
| AC091057. | MIR222HG   |
| CCNF      | MIR222HG   |
| NEK2      | RAB11B-AS1 |
| HIST1H3G  | RAB11B-AS1 |
| TOP2A     | RAB11B-AS1 |
| HIST1H3F  | RAB11B-AS1 |
| HIST1H3I  | RAB11B-AS1 |
| KIF20A    | RAB11B-AS1 |
| RECQL4    | RAB11B-AS1 |
| PYCR1     | RAB11B-AS1 |
| C3orf67   | RAB11B-AS1 |
| KIF24     | RAB11B-AS1 |
| CMA1      | AC092910.3 |
| DMGDH     | AC092910.3 |
| DMRT2     | AC092910.3 |
| SCN4A     | AC092910.3 |
