# Supplementary material for: Identification of Crucial lncRNAs for Luminal A Breast Cancer through RNA Sequencing
Source: Hindawi journal article supplement (doi:10.1155/2022/6577942), 2022-06-02
Supplement: f1 [file 6577942.f1.zip]

| mRNAsig   | lncRNAsig  |
|-----------|------------|
| RRAGD     | LINC01697  |
| LG14      | LINC01697  |
| LIFR      | LINC01697  |
| F8        | LINC01697  |
| CRYBG3    | LINC01697  |
| JAM2      | LINC01697  |
| KDR       | LINC01697  |
| SHE       | LINC01697  |
| TACR1     | AC097534.1 |
| NTRK3     | AC097534.1 |
| MAB21L1   | AC097534.1 |
| TNXB      | AC097534.1 |
| SPRY2     | AC097534.1 |
| ZDBF2     | AC097534.1 |
| CHL1      | AC097534.1 |
| PRR26     | AC097534.1 |
| ITM2A     | AC097534.1 |
| PLEKHM3   | AC097534.1 |
| MAP2K6    | AC108477.1 |
| LYVE1     | LINC00968  |
| CLEC3B    | LINC00968  |
| CACNA2D1  | LINC00968  |
| BMP2      | LINC00968  |
| MAOA      | LINC00968  |
| ACSM5     | LINC00968  |
| KLHL31    | LINC00968  |
| ANGPTL4   | LINC00968  |
| AC093155. | LINC00968  |
| ACACB     | LINC00968  |
| FAM89A    | LINC00968  |
| MTURN     | LINC00968  |
| MDFIC     | LINC00968  |
| RASL10B   | LINC00968  |
| ZFP36     | LINC00968  |
| GNG2      | LINC00968  |
| ENPP2     | LINC00968  |
| NMB       | LINC00968  |
| SYNE3     | LINC00968  |
| GFRA2     | LINC00968  |
| SLC35G2   | LINC00968  |
| DTX1      | LINC00968  |
| RNF157    | LINC00968  |
| SOCS3     | LINC00968  |
| DEPP1     | LINC00968  |
| CCDC69    | LINC00968  |
| PALMD     | LINC00968  |
| CD34      | LINC00968  |
| TLN2      | LINC00968  |
| C19orf12  | LINC00968  |
| AC01      | LINC00968  |

|            |            |
|------------|------------|
| CAT        | LINC00968  |
| PALM2-AKAL | LINC00968  |
| SPTBN1     | LINC00968  |
| ARHGEF6    | LINC00968  |
| ITSN1      | LINC00968  |
| F8         | LINC00968  |
| PPP2R1B    | LINC00968  |
| GYPC       | LINC00968  |
| ECHDC3     | LINC00968  |
| ANTXR2     | LINC00968  |
| VEGFB      | LINC00968  |
| FERMT2     | LINC00968  |
| ADIRF      | LINC00968  |
| CAMK1      | LINC00968  |
| PLPP3      | LINC00968  |
| RAPGEF3    | LINC00968  |
| GDPD5      | LINC00968  |
| NEK7       | LINC00968  |
| TNIP1      | LINC00968  |
| CRYBG3     | LINC00968  |
| JAM2       | LINC00968  |
| TMEM64     | LINC00968  |
| DCUN1D3    | LINC00968  |
| CDKN1A     | LINC00968  |
| ZFAND5     | LINC00968  |
| ANXA5      | LINC00968  |
| CARD6      | LINC00968  |
| MYO1C      | LINC00968  |
| UGP2       | LINC00968  |
| TNFAIP8    | LINC00968  |
| SH3GLB1    | LINC00968  |
| PDE11A     | LINC00968  |
| DHDDS      | LINC00968  |
| ETFDH      | LINC00968  |
| KIF1C      | LINC00968  |
| C2CD2      | LINC00968  |
| SHE        | LINC00968  |
| TACC1      | LINC00968  |
| CD99L2     | LINC00968  |
| PCYOX1     | LINC00968  |
| TFF1       | AC055854.1 |
| LRRC15     | AC055854.1 |
| ASF1B      | AC055854.1 |
| DIO2       | AC055854.1 |
| CKS2       | AC055854.1 |
| HIST3H2BE  | AC055854.1 |
| CFL1       | AC055854.1 |
| ZNF92      | AC055854.1 |
| SP110      | AC055854.1 |
| DPCD       | AC055854.1 |
| HSD17B13   | LINC02202  |

|          |           |
|----------|-----------|
| CALB2    | LINC02202 |
| AKR1C1   | LINC02202 |
| LYVE1    | LINC02202 |
| ITIH5    | LINC02202 |
| APOB     | LINC02202 |
| RDH5     | LINC02202 |
| ADRA1A   | LINC02202 |
| NPY5R    | LINC02202 |
| AKR1C3   | LINC02202 |
| CLEC3B   | LINC02202 |
| ANGPT1   | LINC02202 |
| CACNA2D1 | LINC02202 |
| CAV2     | LINC02202 |
| SORBS1   | LINC02202 |
| SEMA3G   | LINC02202 |
| BMP2     | LINC02202 |
| MT1M     | LINC02202 |
| ITGA7    | LINC02202 |
| ACACB    | LINC02202 |
| EBF1     | LINC02202 |
| MDFIC    | LINC02202 |
| TNS1     | LINC02202 |
| CAV1     | LINC02202 |
| DDR2     | LINC02202 |
| TMEM100  | LINC02202 |
| MCAM     | LINC02202 |
| CLMP     | LINC02202 |
| SLC35G2  | LINC02202 |
| C8orf34  | LINC02202 |
| DTX1     | LINC02202 |
| RNF157   | LINC02202 |
| GSN      | LINC02202 |
| PALM     | LINC02202 |
| DEPP1    | LINC02202 |
| PALMD    | LINC02202 |
| SIK2     | LINC02202 |
| CAT      | LINC02202 |
| DSEL     | LINC02202 |
| SEMA3A   | LINC02202 |
| SYNPO    | LINC02202 |
| ARHGEF6  | LINC02202 |
| RGCC     | LINC02202 |
| EPDR1    | LINC02202 |
| PPP2R1B  | LINC02202 |
| EPAS1    | LINC02202 |
| NMT2     | LINC02202 |
| ACSS2    | LINC02202 |
| TGFBR2   | LINC02202 |
| FERMT2   | LINC02202 |
| PLPP3    | LINC02202 |
| ADRB2    | LINC02202 |

|           |            |
|-----------|------------|
| TEAD1     | LINC02202  |
| CCND2     | LINC02202  |
| STAT5A    | LINC02202  |
| CDKN1A    | LINC02202  |
| CARD6     | LINC02202  |
| BIN1      | LINC02202  |
| SH3D19    | LINC02202  |
| CRTAP     | LINC02202  |
| ARHGAP42  | LINC02202  |
| C2CD2     | LINC02202  |
| TACC1     | LINC02202  |
| FOXO1     | LINC02202  |
| ITPRIP    | LINC02202  |
| CD300LG   | AC110597.1 |
| AQP7      | AC110597.1 |
| MYZAP     | AC110597.1 |
| PQLC2L    | AC110597.1 |
| MLXIPL    | AC110597.1 |
| CXCL2     | AC110597.1 |
| FIGN      | AC110597.1 |
| SLC10A6   | AC110597.1 |
| WDR49     | AC110597.1 |
| KCNJ8     | AC110597.1 |
| MME       | AC110597.1 |
| CYYR1     | AC110597.1 |
| CLIC5     | AC110597.1 |
| CHST3     | AC110597.1 |
| FGD4      | AC110597.1 |
| FAM171A1  | AC110597.1 |
| MAMDC2    | AC110597.1 |
| PGRMC2    | AC110597.1 |
| PDGFD     | AC110597.1 |
| KAT2B     | AC110597.1 |
| ALAD      | AC110597.1 |
| PLSCR4    | AC110597.1 |
| UST       | AC110597.1 |
| KDR       | AC110597.1 |
| SAT2      | AC110597.1 |
| EZH1      | AC110597.1 |
| ZDHHC2    | AC110597.1 |
| PCOLCE2   | RHOXF1-AS1 |
| GOS2      | RHOXF1-AS1 |
| LIPE      | RHOXF1-AS1 |
| CIDEA     | RHOXF1-AS1 |
| C14orf18C | RHOXF1-AS1 |
| LGALS12   | RHOXF1-AS1 |
| PFKFB1    | RHOXF1-AS1 |
| SLC7A10   | RHOXF1-AS1 |
| AGPAT2    | RHOXF1-AS1 |
| PC        | RHOXF1-AS1 |
| BTG2      | RHOXF1-AS1 |

|           |            |
|-----------|------------|
| ACKR3     | RHOXF1-AS1 |
| GPD1      | TRHDE-AS1  |
| PLIN1     | TRHDE-AS1  |
| CIDEC     | TRHDE-AS1  |
| TUSC5     | TRHDE-AS1  |
| ADIPOQ    | TRHDE-AS1  |
| LPL       | TRHDE-AS1  |
| PLIN4     | TRHDE-AS1  |
| FABP4     | TRHDE-AS1  |
| RBP4      | TRHDE-AS1  |
| HSPB7     | TRHDE-AS1  |
| GOS2      | TRHDE-AS1  |
| LIPE      | TRHDE-AS1  |
| SAA1      | TRHDE-AS1  |
| NAT8L     | TRHDE-AS1  |
| HEPACAM   | TRHDE-AS1  |
| CALB2     | TRHDE-AS1  |
| ALDH1L1   | TRHDE-AS1  |
| AOC3      | TRHDE-AS1  |
| SLC19A3   | TRHDE-AS1  |
| ITIH5     | TRHDE-AS1  |
| APOB      | TRHDE-AS1  |
| SLC16A7   | TRHDE-AS1  |
| RDH5      | TRHDE-AS1  |
| S100B     | TRHDE-AS1  |
| KCNIP2    | TRHDE-AS1  |
| SLC2A4    | TRHDE-AS1  |
| ANGPT1    | TRHDE-AS1  |
| CAV2      | TRHDE-AS1  |
| SORBS1    | TRHDE-AS1  |
| NPR1      | TRHDE-AS1  |
| FHL1      | TRHDE-AS1  |
| KLF15     | TRHDE-AS1  |
| ITGA7     | TRHDE-AS1  |
| GHR       | TRHDE-AS1  |
| TNS1      | TRHDE-AS1  |
| DUSP1     | TRHDE-AS1  |
| NPR3      | TRHDE-AS1  |
| FOS       | TRHDE-AS1  |
| MCAM      | TRHDE-AS1  |
| CLMP      | TRHDE-AS1  |
| GPT       | TRHDE-AS1  |
| RARRES2   | TRHDE-AS1  |
| HOXA10    | TRHDE-AS1  |
| SIK2      | TRHDE-AS1  |
| SYNP0     | TRHDE-AS1  |
| ARHGEF6   | TRHDE-AS1  |
| NIPSNAP3E | TRHDE-AS1  |
| ACSS2     | TRHDE-AS1  |
| DHRS3     | TRHDE-AS1  |
| ANGPTL2   | TRHDE-AS1  |

|           |            |
|-----------|------------|
| NATD1     | TRHDE-AS1  |
| PGRMC2    | TRHDE-AS1  |
| GABARAPL1 | TRHDE-AS1  |
| TEAD1     | TRHDE-AS1  |
| KAT2B     | TRHDE-AS1  |
| ALAD      | TRHDE-AS1  |
| FAM83D    | AP000439.2 |
| CEP55     | AP000439.2 |
| TOP2A     | AP000439.2 |
| KIF14     | AP000439.2 |
| HIST1H2AL | AP000439.2 |
| FAM111B   | AP000439.2 |
| CDCA5     | AP000439.2 |
| RAD54L    | AP000439.2 |
| CDCA2     | AP000439.2 |
| UHRF1     | AP000439.2 |
| NDC80     | AP000439.2 |
| HPX       | AP000439.2 |
| HIST1H2AM | AP000439.2 |
| NUF2      | AP000439.2 |
| KIFC1     | AP000439.2 |
| KNL1      | AP000439.2 |
| CDCA8     | AP000439.2 |
| GTSE1     | AP000439.2 |
| FRMPD3    | AP000439.2 |
| KIF20A    | AP000439.2 |
| FAM72D    | AP000439.2 |
| AURKA     | AP000439.2 |
| FANCI     | AP000439.2 |
| ECT2      | AP000439.2 |
| RECQL4    | AP000439.2 |
| HIST1H2BH | AP000439.2 |
| OTUB2     | AP000439.2 |
| CCNB1     | AP000439.2 |
| MCM4      | AP000439.2 |
| HIST2H2AA | AP000439.2 |
| HIST2H2AA | AP000439.2 |
| MCM2      | AP000439.2 |
| PAQR4     | AP000439.2 |
| ENTPD7    | AP000439.2 |
| SMC4      | AP000439.2 |
| PDIA4     | AP000439.2 |
| SLC12A8   | AP000439.2 |
| SEPHS2    | AP000439.2 |
| SLC20A1   | AP000439.2 |
| DGKD      | AP000439.2 |
| YIPF1     | AP000439.2 |
| NCAPG2    | AP000439.2 |
| FANCD2    | AP000439.2 |
| GJB2      | AL139220.2 |
| WISP1     | AL139220.2 |

|          |            |
|----------|------------|
| NAT1     | AL139220.2 |
| RAMP1    | AL139220.2 |
| CLEC5A   | AL139220.2 |
| HPN      | AL139220.2 |
| B4GALNT4 | AL139220.2 |
| TIMP1    | AL139220.2 |
| MCRIP2   | AL139220.2 |
| CYP4Z1   | LINC01906  |
| F2RL2    | LINC01906  |
| NAT1     | LINC01906  |
| HPN      | LINC01906  |
| OAS2     | LINC01906  |
| OASL     | LINC01906  |
| MUC1     | LINC01906  |
| E2F7     | AL133373.2 |
| ZNF138   | AL133373.2 |
| HOXC13   | HOXC-AS3   |
| HOXC10   | HOXC-AS3   |
| UTP20    | HOXC-AS3   |
| CIDEC    | AL078639.1 |
| TUSC5    | AL078639.1 |
| ADIPOQ   | AL078639.1 |
| FABP4    | AL078639.1 |
| RBP4     | AL078639.1 |
| NNAT     | AL078639.1 |
| AOC3     | AL078639.1 |
| SLC19A3  | AL078639.1 |
| SLC16A7  | AL078639.1 |
| KCNIP2   | AL078639.1 |
| RARRES2  | AL078639.1 |
| SIX2     | LINC00473  |
| FAM72B   | LINC00473  |
| CPB1     | AP005121.1 |
| GRIA2    | AP005121.1 |
| FOXJ1    | AP005121.1 |
| MATN3    | AP005121.1 |
| ADAMTS16 | AP005121.1 |
| TPH1     | AP005121.1 |
| SFRP2    | AP005121.1 |
| EVL      | AP005121.1 |
| OAS3     | AP005121.1 |
| LOXL1    | AP005121.1 |
| OASL     | AP005121.1 |
| PYCARD   | AP005121.1 |
| IRF7     | AP005121.1 |
| OAS1     | AP005121.1 |
| SLC40A1  | AP005121.1 |
| FGD3     | AP005121.1 |
| REPS2    | AP005121.1 |
| SAMD9    | AP005121.1 |
| PARP9    | AP005121.1 |

|           |            |
|-----------|------------|
| NUP210    | AP005121.1 |
| CCR5      | AC005837.1 |
| AC093155. | LINC01230  |
| SGK2      | LINC01230  |
| RASL10B   | LINC01230  |
| NPR3      | LINC01230  |
| RNF157    | LINC01230  |
| CDKN2C    | LINC01230  |
| PKDCC     | LINC01230  |
| EPAS1     | LINC01230  |
| VKORC1L1  | LINC01230  |
| GDPD5     | LINC01230  |
| TEAD1     | LINC01230  |
| CDKN1A    | LINC01230  |
| CBX2      | MEG8       |
| CDKN3     | AL356740.2 |
| CCR5      | AL356740.2 |
| F2RL2     | AL139412.1 |
| RASL11B   | AL139412.1 |
| MUC1      | AL139412.1 |
| TPRN      | AL139412.1 |
| UBXN10    | AL139412.1 |
| RAI14     | AL139412.1 |
| RALGPS2   | AL139412.1 |
| FAM174B   | AC091544.4 |
| TTC39A    | AC091544.4 |
| ORC1      | AL645608.1 |
| PRR11     | AL645608.1 |
| SDR16C5   | AL645608.1 |
| ADAMTS17  | AL645608.1 |
| GALNT7    | AL645608.1 |
| UCP2      | AL645608.1 |
| TMEM241   | AL645608.1 |
| CTPS1     | AL645608.1 |
| ADSS      | AL645608.1 |
| KIF14     | LINC00664  |
| HSPB7     | AP001528.2 |
| SAA1      | AP001528.2 |
| CALB2     | AP001528.2 |
| LYVE1     | AP001528.2 |
| AOC3      | AP001528.2 |
| CHRD1     | AP001528.2 |
| RDH5      | AP001528.2 |
| AKR1C3    | AP001528.2 |
| CLEC3B    | AP001528.2 |
| ANGPT1    | AP001528.2 |
| CACNA2D1  | AP001528.2 |
| SEMA3G    | AP001528.2 |
| NPR1      | AP001528.2 |
| GPX3      | AP001528.2 |
| ACSM5     | AP001528.2 |



|           |            |
|-----------|------------|
| ITGA7     | AP001528.2 |
| FAM89A    | AP001528.2 |
| EBF1      | AP001528.2 |
| MTURN     | AP001528.2 |
| MDFIC     | AP001528.2 |
| TNS1      | AP001528.2 |
| CAV1      | AP001528.2 |
| DDR2      | AP001528.2 |
| AKAP12    | AP001528.2 |
| ANGPTL1   | AP001528.2 |
| TMEM100   | AP001528.2 |
| EBF3      | AP001528.2 |
| GNG2      | AP001528.2 |
| MCAM      | AP001528.2 |
| NLRP3     | AP001528.2 |
| SYNE3     | AP001528.2 |
| GFRA2     | AP001528.2 |
| COX7A1    | AP001528.2 |
| DTX1      | AP001528.2 |
| PLA2G16   | AP001528.2 |
| AOX1      | AP001528.2 |
| GSN       | AP001528.2 |
| PALM      | AP001528.2 |
| RARRES2   | AP001528.2 |
| DEPP1     | AP001528.2 |
| CCDC69    | AP001528.2 |
| SVEP1     | AP001528.2 |
| TLCD2     | AP001528.2 |
| PALMD     | AP001528.2 |
| CPED1     | AP001528.2 |
| TWIST2    | AP001528.2 |
| C19orf12  | AP001528.2 |
| KLF4      | AP001528.2 |
| CAT       | AP001528.2 |
| PALM2-AKA | AP001528.2 |
| AFAP1L1   | AP001528.2 |
| SYNP0     | AP001528.2 |
| ARHGEF6   | AP001528.2 |
| RGCC      | AP001528.2 |
| LAMA4     | AP001528.2 |
| RILP      | AP001528.2 |
| VIM       | AP001528.2 |
| MAP7D3    | AP001528.2 |
| ECHDC3    | AP001528.2 |
| DLC1      | AP001528.2 |
| TGFBR2    | AP001528.2 |
| DHRS3     | AP001528.2 |
| FERMT2    | AP001528.2 |
| CAMK1     | AP001528.2 |
| PNPLA2    | AP001528.2 |
| SNTA1     | AP001528.2 |

|             |            |
|-------------|------------|
| CCND2       | AP001528.2 |
| TIMP3       | AP001528.2 |
| NEK7        | AP001528.2 |
| CSPG4       | AP001528.2 |
| CDKN1A      | AP001528.2 |
| ANXA5       | AP001528.2 |
| MYO1C       | AP001528.2 |
| ACAT1       | AP001528.2 |
| SH3D19      | AP001528.2 |
| TK2         | AP001528.2 |
| CRTAP       | AP001528.2 |
| ARHGAP42    | AP001528.2 |
| TACC1       | AP001528.2 |
| ITPRIP      | AP001528.2 |
| PPP2R2C     | LINC02303  |
| SGO1        | LINC02303  |
| MAK         | LINC02303  |
| ADAMDEC1    | LINC02303  |
| AC007325.   | LINC02303  |
| CCNE2       | LINC02303  |
| E2F7        | LINC02303  |
| CKAP2       | LINC02303  |
| ZNHIT2      | LINC02303  |
| MICAL2      | LINC02303  |
| CFL1        | LINC02303  |
| ZNF253      | LINC02303  |
| ADTRP       | AL117190.1 |
| COG6        | AL117190.1 |
| HIST1H2AIAL | AL354707.1 |
| MYBL2       | AL354707.1 |
| ANLN        | AL354707.1 |
| CXCL9       | AL354707.1 |
| CENPF       | AL354707.1 |
| CDC45       | AL354707.1 |
| ORC1        | AL354707.1 |
| BUB1        | AL354707.1 |
| HIST1H2BLAL | AL354707.1 |
| HMGB3       | AL354707.1 |
| FAM72D      | AL354707.1 |
| PRR11       | AL354707.1 |
| KIF23       | AL354707.1 |
| HIST1H2BEAL | AL354707.1 |
| E2F1        | AL354707.1 |
| BRIP1       | AL354707.1 |
| SLC6A9      | AL354707.1 |
| HIST1H3D    | AL354707.1 |
| DNAH14      | AL354707.1 |
| SERPINE2    | AL354707.1 |
| ATP6VOB     | AL354707.1 |
| TMEM206     | AL354707.1 |
| HIST1H4K    | AL354707.1 |

|          |            |
|----------|------------|
| HIST1H4J | AL354707.1 |
| CIP2A    | AL354707.1 |
| RAB3D    | AL354707.1 |
| MAGED1   | AL354707.1 |
| SRD5A3   | AL354707.1 |
| SHMT2    | AL354707.1 |
| SLC37A1  | AL354707.1 |
| S100A11  | AL354707.1 |
| NCAPG2   | AL354707.1 |
| RNF182   | MEG9       |
| C4A      | LINC00536  |
| EVL      | MRPS30-DT  |
| LONRF2   | MRPS30-DT  |
| TRAF5    | MRPS30-DT  |
| CNTFR    | AC020907.2 |
| SCARA5   | AC020907.2 |
| FXYD1    | AC020907.2 |
| FM02     | AC020907.2 |
| F10      | AC020907.2 |
| TEF      | AC020907.2 |
| MYC      | AC020907.2 |
| FAM83D   | AC074135.1 |
| NUSAP1   | AC074135.1 |
| FRMPD3   | AC074135.1 |
| SLC30A8  | AC074135.1 |
| DIAPH3   | AC074135.1 |
| CIT      | AC074135.1 |
| E2F2     | AC074135.1 |
| CENPK    | AC074135.1 |
| TMC5     | AC074135.1 |
| CHEK1    | AC074135.1 |
| KIAA1211 | AC068669.1 |
| DPT      | LINC01140  |
| AKR1C3   | LINC01140  |
| CLEC3B   | LINC01140  |
| ANGPT1   | LINC01140  |
| CACNA2D1 | LINC01140  |
| SEMA3G   | LINC01140  |
| ITGA7    | LINC01140  |
| MDFIC    | LINC01140  |
| CAV1     | LINC01140  |
| DDR2     | LINC01140  |
| GALNT13  | LINC01140  |
| EBF3     | LINC01140  |
| GNG2     | LINC01140  |
| NLRP3    | LINC01140  |
| SYNE3    | LINC01140  |
| GFRA2    | LINC01140  |
| COX7A1   | LINC01140  |
| PLA2G16  | LINC01140  |
| GSN      | LINC01140  |

|           |            |
|-----------|------------|
| PALM      | LINC01140  |
| DEPP1     | LINC01140  |
| CCDC69    | LINC01140  |
| TLCD2     | LINC01140  |
| GPR146    | LINC01140  |
| C19orf12  | LINC01140  |
| CAT       | LINC01140  |
| PALM2-AKA | LINC01140  |
| AFAP1L1   | LINC01140  |
| LAMA4     | LINC01140  |
| RILP      | LINC01140  |
| AIFM2     | LINC01140  |
| VEGFB     | LINC01140  |
| SMIM3     | LINC01140  |
| FERMT2    | LINC01140  |
| CAMK1     | LINC01140  |
| PNPLA2    | LINC01140  |
| SNTA1     | LINC01140  |
| RASA3     | LINC01140  |
| CCND2     | LINC01140  |
| TIMP3     | LINC01140  |
| NEK7      | LINC01140  |
| TNIP1     | LINC01140  |
| CSPG4     | LINC01140  |
| ANXA5     | LINC01140  |
| PLOD2     | LINC01140  |
| MYO1C     | LINC01140  |
| ACAT1     | LINC01140  |
| SH3D19    | LINC01140  |
| TK2       | LINC01140  |
| CRTAP     | LINC01140  |
| EPHX1     | LINC01140  |
| C2CD2     | LINC01140  |
| CD99L2    | LINC01140  |
| ITPRIP    | LINC01140  |
| SAA1      | AP001528.3 |
| CFD       | AP001528.3 |
| CD300LG   | AP001528.3 |
| ALDH1L1   | AP001528.3 |
| ITIH5     | AP001528.3 |
| APOB      | AP001528.3 |
| CNTFR     | AP001528.3 |
| BTNL9     | AP001528.3 |
| CAV2      | AP001528.3 |
| SORBS1    | AP001528.3 |
| BMP2      | AP001528.3 |
| SAA2      | AP001528.3 |
| ACACB     | AP001528.3 |
| EBF1      | AP001528.3 |
| DUSP1     | AP001528.3 |
| FOS       | AP001528.3 |

|          |            |
|----------|------------|
| SLC35G2  | AP001528.3 |
| C8orf34  | AP001528.3 |
| DTX1     | AP001528.3 |
| GSN      | AP001528.3 |
| DEPP1    | AP001528.3 |
| PALMD    | AP001528.3 |
| CKMT2    | AP001528.3 |
| COL25A1  | AP001528.3 |
| RGCC     | AP001528.3 |
| CLIC5    | AP001528.3 |
| NMT2     | AP001528.3 |
| TGFBR2   | AP001528.3 |
| TEF      | AP001528.3 |
| FGD4     | AP001528.3 |
| PLPP3    | AP001528.3 |
| STAT5A   | AP001528.3 |
| KAT2B    | AP001528.3 |
| CRYBG3   | AP001528.3 |
| ALAD     | AP001528.3 |
| JAM2     | AP001528.3 |
| UST      | AP001528.3 |
| CARD6    | AP001528.3 |
| TNFAIP8  | AP001528.3 |
| ARHGAP42 | AP001528.3 |
| SOD2     | AP001528.3 |
| FOXO1    | AP001528.3 |
| MMD      | LINC01239  |
| PRKAR2B  | LINC01239  |
| ACSL1    | LINC01239  |
| TRHDE    | LINC01239  |
| IRX6     | LINC01239  |
| GNAI1    | LINC01239  |
| MGLL     | LINC01239  |
| NMB      | LINC01239  |
| RETSAT   | LINC01239  |
| ACO1     | LINC01239  |
| SPTBN1   | LINC01239  |
| FAM213A  | LINC01239  |
| COQ8A    | LINC01239  |
| RHOBTB3  | LINC01239  |
| GBE1     | LINC01239  |
| GRK3     | LINC01239  |
| DIAPH2   | LINC01239  |
| PTPRS    | LINC01239  |
| ITGB1BP1 | LINC01239  |
| UGP2     | LINC01239  |
| PGM1     | LINC01239  |
| PDE11A   | LINC01239  |
| PCYOX1   | LINC01239  |
| FAM174B  | LINC00930  |
| FBXO21   | LINC00930  |

|           |            |
|-----------|------------|
| ARL1      | LINC00930  |
| NNAT      | AC134043.2 |
| SAA1      | AC134043.2 |
| CALB2     | AC134043.2 |
| ITIH5     | AC134043.2 |
| RDH5      | AC134043.2 |
| SLC2A4    | AC134043.2 |
| CACNA2D1  | AC134043.2 |
| SORBS1    | AC134043.2 |
| SAA2      | AC134043.2 |
| KLF15     | AC134043.2 |
| TNS1      | AC134043.2 |
| CAV1      | AC134043.2 |
| DDR2      | AC134043.2 |
| TMEM100   | AC134043.2 |
| MCAM      | AC134043.2 |
| COX7A1    | AC134043.2 |
| AOX1      | AC134043.2 |
| GSN       | AC134043.2 |
| DEPP1     | AC134043.2 |
| SCN9A     | AC134043.2 |
| TWIST2    | AC134043.2 |
| SIK2      | AC134043.2 |
| KLF4      | AC134043.2 |
| FAM107A   | AC134043.2 |
| CAT       | AC134043.2 |
| DSEL      | AC134043.2 |
| ARHGEF6   | AC134043.2 |
| RGCC      | AC134043.2 |
| PPP2R1B   | AC134043.2 |
| RILP      | AC134043.2 |
| ECHDC3    | AC134043.2 |
| NMT2      | AC134043.2 |
| TGFBR2    | AC134043.2 |
| DHRS3     | AC134043.2 |
| FERMT2    | AC134043.2 |
| ANGPTL2   | AC134043.2 |
| PNPLA2    | AC134043.2 |
| GABARAPL1 | AC134043.2 |
| FADS3     | AC134043.2 |
| STAT5A    | AC134043.2 |
| CDKN1A    | AC134043.2 |
| ACAT1     | AC134043.2 |
| SH3D19    | AC134043.2 |
| PLPP1     | AC134043.2 |
| TK2       | AC134043.2 |
| CRTAP     | AC134043.2 |
| ARHGAP42  | AC134043.2 |
| TACC1     | AC134043.2 |
| FOXO1     | AC134043.2 |
| DPT       | AC093278.2 |

|         |            |
|---------|------------|
| SLC35G2 | AC093278.2 |
| ADGRF5  | AC093278.2 |
| EDNRB   | AC093278.2 |
| SLC10A6 | AC093278.2 |
| TLN2    | AC093278.2 |
| TXNIP   | AC093278.2 |
| CDH5    | AC093278.2 |
| PLPP3   | AC093278.2 |
| SLC30A8 | LINC00511  |
| TDG     | LINC00511  |
| STK36   | LINC00511  |
| GOS2    | AC024909.2 |
| NNAT    | AC024909.2 |
| S100B   | AC024909.2 |
| HADH    | AC024909.2 |
| SPTSSB  | AC118658.2 |
| IGF1R   | AC118658.2 |
| ORC1    | AC144450.1 |
| HPX     | AC144450.1 |
| GJB1    | AC144450.1 |
| ERBB2   | AC144450.1 |
| SAPCD2  | AC144450.1 |
| RTKN2   | AC144450.1 |
| GALNT7  | AC144450.1 |
| DHRS13  | AC144450.1 |
| MBOAT2  | AC144450.1 |
| HID1    | AC144450.1 |
| EGLN3   | LINC02085  |
| DNAJA4  | LINC02085  |
| KLF9    | LINC00598  |
| TNMD    | PCAT19     |
| ADH1C   | PCAT19     |
| LRRC59  | AC079310.1 |
| DDX52   | AC079310.1 |
| PSMD3   | AC079310.1 |
| MSL1    | AC079310.1 |
| GJB1    | AC079310.1 |
| SLC35B1 | AC079310.1 |
| MED24   | AC079310.1 |
| XYLT2   | AC079310.1 |
| CAPS    | AC079310.1 |
| NDC1    | AC079310.1 |
| NBEA    | AC079310.1 |
| STARD3  | AC079310.1 |
| MSH6    | AC079310.1 |
| HSPH1   | AC079310.1 |
| UTP18   | AC079310.1 |
| HMGCS1  | AC079310.1 |
| LMNB2   | AC079310.1 |
| BMF     | AC079310.1 |
| CPSF3   | AC079310.1 |

|         |            |
|---------|------------|
| PGAP3   | AC079310.1 |
| DNAJA4  | AC079310.1 |
| UBE2T   | HOTAIR     |
| LRRC31  | HOTAIR     |
| AMMECR1 | HOTAIR     |
| CDC7    | HOTAIR     |
| OPN3    | HOTAIR     |
| HSD17B7 | HOTAIR     |
| TRERF1  | HOTAIR     |
| ABCA12  | AC159540.2 |
| DEPDC1  | AC159540.2 |
| RRM2    | AC159540.2 |
| SAMD11  | AC159540.2 |
| FBN2    | AC159540.2 |
| MN1     | AC159540.2 |
| ANO7    | AC159540.2 |
| TMEM206 | AC159540.2 |
| CCDC150 | AC159540.2 |
| RAB3D   | AC159540.2 |
| MAGED1  | AC159540.2 |
| DHRS13  | AC159540.2 |
| SRD5A3  | AC159540.2 |
| NEMP1   | AC159540.2 |
| TTYH3   | AC159540.2 |
| HID1    | AC159540.2 |
| LAMP5   | AC013652.1 |
| ARNT2   | AC013652.1 |
| TESMIN  | AC013652.1 |
| SYT7    | AC013652.1 |
| HSD17B7 | AC013652.1 |
| WDR90   | AC013652.1 |
| NUP210  | AC013652.1 |
| RASL11B | AC016705.2 |
| BPIFB1  | AL365181.3 |
| PRCD    | AC011379.1 |
| WNT11   | AC011379.1 |
| WDR49   | AC011379.1 |
| FGD4    | AC011379.1 |
| NEK2    | RHPN1-AS1  |
| FAM83D  | RHPN1-AS1  |
| CEP55   | RHPN1-AS1  |
| PKMYT1  | RHPN1-AS1  |
| NDC80   | RHPN1-AS1  |
| NUF2    | RHPN1-AS1  |
| SGO1    | RHPN1-AS1  |
| MAK     | RHPN1-AS1  |
| CCNE2   | RHPN1-AS1  |
| CKAP2   | RHPN1-AS1  |
| SLC20A1 | RHPN1-AS1  |
| ZNF253  | RHPN1-AS1  |
| MYCBP   | RHPN1-AS1  |



|          |            |
|----------|------------|
| CBX2     | MEG3       |
| STARD3   | MEG3       |
| ITIH5    | AC026461.1 |
| PQLC2L   | AC026461.1 |
| CAVIN2   | AC026461.1 |
| SAA2     | AC026461.1 |
| KLF15    | AC026461.1 |
| SCARA5   | AC026461.1 |
| MT1M     | AC026461.1 |
| GHR      | AC026461.1 |
| TNS1     | AC026461.1 |
| TMEM100  | AC026461.1 |
| MYOM1    | AC026461.1 |
| FIGN     | AC026461.1 |
| MT1X     | AC026461.1 |
| P2RY12   | AC026461.1 |
| SCN9A    | AC026461.1 |
| CRYAB    | AC026461.1 |
| LRRN4CL  | AC026461.1 |
| NLGN1    | AC026461.1 |
| CKMT2    | AC026461.1 |
| FAM107A  | AC026461.1 |
| DSEL     | AC026461.1 |
| RGCC     | AC026461.1 |
| CHST3    | AC026461.1 |
| TENM1    | AC026461.1 |
| CAVIN1   | AC026461.1 |
| MMRN2    | AC026461.1 |
| TMTC1    | AC026461.1 |
| ANXA1    | AC026461.1 |
| DLC1     | AC026461.1 |
| NMT2     | AC026461.1 |
| TGFBR2   | AC026461.1 |
| EHD2     | AC026461.1 |
| EFEMP1   | AC026461.1 |
| TEF      | AC026461.1 |
| ADAMTS5  | AC026461.1 |
| MPP6     | AC026461.1 |
| SOX5     | AC026461.1 |
| GNAL     | AC026461.1 |
| PROS1    | AC026461.1 |
| STAT5A   | AC026461.1 |
| IRS2     | AC026461.1 |
| KAT2B    | AC026461.1 |
| LHFPL6   | AC026461.1 |
| ADAMTS1  | AC026461.1 |
| CDC42BPA | AC026461.1 |
| SH3D19   | AC026461.1 |
| PLPP1    | AC026461.1 |
| EZH1     | AC026461.1 |
| ZDHHC2   | AC026461.1 |

|          |            |
|----------|------------|
| FOXO1    | AC026461.1 |
| PTPRG    | AC026461.1 |
| ITPRIP   | AC026461.1 |
| PROX1    | AC105046.1 |
| ADRB1    | FGF14-AS2  |
| CAB39    | FGF14-AS2  |
| FFAR2    | AC141930.1 |
| SIX2     | AC141930.1 |
| KIF1A    | AC141930.1 |
| GJB1     | AC141930.1 |
| CENPU    | AC141930.1 |
| FAM72B   | AC141930.1 |
| GALNT7   | AC141930.1 |
| NPY5R    | AC007036.3 |
| PRKAR2B  | AC007036.3 |
| MGLL     | AC007036.3 |
| WASF3    | AC007036.3 |
| COQ8A    | AC007036.3 |
| GRK3     | AC007036.3 |
| PTPRS    | AC007036.3 |
| ITGB1BP1 | AC007036.3 |
| UGP2     | AC007036.3 |
| PGM1     | AC007036.3 |
| FABP4    | AC104986.2 |
| ADH1B    | AC104986.2 |
| TMEM132C | AC104986.2 |
| ATP1A2   | AC104986.2 |
| SOD3     | AC104986.2 |
| SLC22A3  | AC104986.2 |
| ECSCR    | AC104986.2 |
| PLEKHA8  | DGUOK-AS1  |
| ADRA1A   | LIPE-AS1   |
| BIN1     | LIPE-AS1   |
| TEK      | EMX2OS     |
| DAAM2    | EMX2OS     |
| PTPRB    | EMX2OS     |
| KIF14    | AC106820.2 |
| PGM5     | AC132217.1 |
| IGFBP6   | AC132217.1 |
| IGF2     | AC132217.1 |
| SATB1    | AC132217.1 |
| CD300LG  | AP001816.1 |
| DENND2A  | AP001816.1 |
| KCNJ8    | AP001816.1 |
| STXBP1   | AP001816.1 |
| ALDOC    | LINC01550  |
| ADRB1    | LINC01550  |
| GPC3     | LINC01550  |
| TF       | LINC01550  |
| LARP6    | LINC01550  |
| RASGEF1B | LINC01550  |

|           |            |
|-----------|------------|
| FBX08     | LINC01550  |
| USP53     | LINC01550  |
| CAB39     | LINC01550  |
| S100A7    | AL645608.3 |
| S100A8    | AL645608.3 |
| ERBB2     | AL645608.3 |
| SLC35B1   | AL645608.3 |
| MRPL27    | AL645608.3 |
| XYLT2     | AL645608.3 |
| DPH2      | AL645608.3 |
| MSH6      | AL645608.3 |
| AC023055. | AC009119.1 |
| PRR11     | AC009119.1 |
| EZH2      | HELLPAR    |
| NDC1      | HELLPAR    |
| MYO10     | HELLPAR    |
| KDM5B     | HELLPAR    |
| FLVCR1    | HELLPAR    |
| NEMP1     | HELLPAR    |
| TFF3      | TERC       |
| PRAME     | TERC       |
| HIST1H3I  | TERC       |
| KIF24     | TERC       |
| LEP       | AC020915.3 |
| ADIPOQ    | AC020915.3 |
| LPL       | AC020915.3 |
| GLYAT     | AC020915.3 |
| CD36      | AC020915.3 |
| HSD17B13  | AC020915.3 |
| AKR1C1    | AC020915.3 |
| AOC3      | AC020915.3 |
| AKR1C3    | AC020915.3 |
| GALNT13   | AC020915.3 |
| RBP7      | AC020915.3 |
| ECM2      | AC020915.3 |
| NACC2     | AC020915.3 |
| PDE5A     | AL731571.1 |
| CLEC4F    | MANEA-AS1  |
| LEP       | AC245452.1 |
| GPD1      | AC245452.1 |
| PLIN1     | AC245452.1 |
| CIDEA     | AC245452.1 |
| ADIPOQ    | AC245452.1 |
| TIMP4     | AC245452.1 |
| LPL       | AC245452.1 |
| PLIN4     | AC245452.1 |
| FABP4     | AC245452.1 |
| GLYAT     | AC245452.1 |
| CD36      | AC245452.1 |
| HSPB7     | AC245452.1 |
| ADH1B     | AC245452.1 |

|          |            |
|----------|------------|
| HSD17B13 | AC245452.1 |
| DPT      | AC245452.1 |
| TMEM132C | AC245452.1 |
| ALDH1L1  | AC245452.1 |
| AOC3     | AC245452.1 |
| PCDH9    | AC245452.1 |
| APOB     | AC245452.1 |
| AKR1C3   | AC245452.1 |
| CLEC3B   | AC245452.1 |
| ANGPT1   | AC245452.1 |
| SEMA3G   | AC245452.1 |
| NPR1     | AC245452.1 |
| GPX3     | AC245452.1 |
| ACSM5    | AC245452.1 |
| ITGA7    | AC245452.1 |
| EBF1     | AC245452.1 |
| CAV1     | AC245452.1 |
| MMP28    | AC245452.1 |
| EBF3     | AC245452.1 |
| SYNE3    | AC245452.1 |
| RBP7     | AC245452.1 |
| ABCC9    | AC245452.1 |
| DTX1     | AC245452.1 |
| GSN      | AC245452.1 |
| PALM     | AC245452.1 |
| RARRES2  | AC245452.1 |
| CCDC69   | AC245452.1 |
| TLN2     | AC245452.1 |
| TXNIP    | AC245452.1 |
| LAMA4    | AC245452.1 |
| JDP2     | AC245452.1 |
| CSPG4    | AC245452.1 |
| ACAT1    | AC245452.1 |
| NACC2    | AC245452.1 |
| CFD      | AC048382.5 |
| CD300LG  | AC048382.5 |
| ALDH1L1  | AC048382.5 |
| ITIH5    | AC048382.5 |
| RDH5     | AC048382.5 |
| ADRA1A   | AC048382.5 |
| BTNL9    | AC048382.5 |
| CAVIN2   | AC048382.5 |
| KLF15    | AC048382.5 |
| SCARA5   | AC048382.5 |
| MT1M     | AC048382.5 |
| ASPA     | AC048382.5 |
| GHR      | AC048382.5 |
| PLAC9    | AC048382.5 |
| TMEM100  | AC048382.5 |
| MYOM1    | AC048382.5 |
| SRPX     | AC048382.5 |

|          |            |
|----------|------------|
| FIGN     | AC048382.5 |
| MT1X     | AC048382.5 |
| P2RY12   | AC048382.5 |
| SCN9A    | AC048382.5 |
| CRYAB    | AC048382.5 |
| LRRN4CL  | AC048382.5 |
| ABCA9    | AC048382.5 |
| FAM107A  | AC048382.5 |
| FREM1    | AC048382.5 |
| DSEL     | AC048382.5 |
| RGCC     | AC048382.5 |
| KANK3    | AC048382.5 |
| TENM1    | AC048382.5 |
| CAVIN1   | AC048382.5 |
| MMRN2    | AC048382.5 |
| TMTC1    | AC048382.5 |
| DLC1     | AC048382.5 |
| NMT2     | AC048382.5 |
| TGFBR2   | AC048382.5 |
| EHD2     | AC048382.5 |
| EFEMP1   | AC048382.5 |
| TEF      | AC048382.5 |
| FAM171A1 | AC048382.5 |
| SOX5     | AC048382.5 |
| GNAL     | AC048382.5 |
| PROS1    | AC048382.5 |
| IRS2     | AC048382.5 |
| KAT2B    | AC048382.5 |
| SH3D19   | AC048382.5 |
| PLPP1    | AC048382.5 |
| PTPRG    | AC048382.5 |
| ITPRIP   | AC048382.5 |
| TUSC5    | TRIM52-AS1 |
| RBP4     | TRIM52-AS1 |
| NNAT     | TRIM52-AS1 |
| HEPACAM  | TRIM52-AS1 |
| FHL1     | TRIM52-AS1 |
| GHR      | TRIM52-AS1 |
| HSPB6    | TRIM52-AS1 |
| CLMP     | TRIM52-AS1 |
| GPT      | TRIM52-AS1 |
| HOXA10   | TRIM52-AS1 |
| DHRS3    | TRIM52-AS1 |
| ANGPTL2  | TRIM52-AS1 |
| MBNL3    | TRIM52-AS1 |
| DEPDC1   | AC023509.2 |
| CXCL11   | AC114271.1 |
| PROX1    | AC011247.1 |
| ATP1A2   | AC020916.1 |
| FOSB     | AC020916.1 |
| PTGS2    | AC020916.1 |

|           |            |
|-----------|------------|
| EVL       | SEPT4-AS1  |
| AC091057. | LINC01814  |
| KIF18A    | LINC01814  |
| PROX1     | ZNF667-AS1 |
| MYZAP     | AL662844.4 |
| SAA2      | AL662844.4 |
| FOS       | AL662844.4 |
| EGR1      | AL662844.4 |
| C8orf34   | AL662844.4 |
| FOSB      | AL662844.4 |
| RNF150    | AL662844.4 |
| RSP03     | AL662844.4 |
| CKMT2     | AL662844.4 |
| MME       | AL662844.4 |
| NIPSNAP3E | AL662844.4 |
| ANXA1     | AL662844.4 |
| MRAS      | AL662844.4 |
| PPP1R15A  | AL662844.4 |
| JUN       | AL662844.4 |
| KANK1     | AL662844.4 |
| CLIP4     | AL662844.4 |
| CSRNP1    | AL662844.4 |
| ATF3      | AL662844.4 |
| ECHDC1    | AL662844.4 |
| EZH1      | AL662844.4 |
| USP53     | AL662844.4 |
| ZDHHC2    | AL662844.4 |
| SCARA5    | MIR222HG   |
| MT1X      | MIR222HG   |
| RSP03     | MIR222HG   |
| APCDD1    | MIR222HG   |
| MME       | MIR222HG   |
| CHST3     | MIR222HG   |
| SPRY2     | MIR222HG   |
| ALDH1A2   | MIR222HG   |
| ADAMTS5   | MIR222HG   |
| MPP6      | MIR222HG   |
| ABCA5     | MIR222HG   |
| ADGRL2    | MIR222HG   |
| CSRP2     | MIR222HG   |
| EZH1      | MIR222HG   |
| SHANK3    | MIR222HG   |
| PQLC2L    | RAB11B-AS1 |
| KCNB1     | RAB11B-AS1 |
| ALDOC     | RAB11B-AS1 |
| ADRB1     | RAB11B-AS1 |
| GPC3      | RAB11B-AS1 |
| TF        | RAB11B-AS1 |
| LARP6     | RAB11B-AS1 |
| RNF150    | RAB11B-AS1 |
| FAM13A    | RAB11B-AS1 |

|          |            |
|----------|------------|
| KANK1    | RAB11B-AS1 |
| CLIP4    | RAB11B-AS1 |
| JADE1    | RAB11B-AS1 |
| MOCS1    | RAB11B-AS1 |
| ECHDC1   | RAB11B-AS1 |
| RASGEF1B | RAB11B-AS1 |
| FAM49A   | RAB11B-AS1 |
| FBX08    | RAB11B-AS1 |
| USP53    | RAB11B-AS1 |
| CAB39    | RAB11B-AS1 |
