# Supplementary material for: Identification of Crucial lncRNAs for Luminal A Breast Cancer through RNA Sequencing
Source: Int J Endocrinol. 2022 Jun 2;2022:6577942. doi: 10.1155/2022/6577942 (PMC9184229; doi:10.1155/2022/6577942)
Supplement: Supplementary Materials — Supplementary Table 1. Positively coexpressed lncRNA-mRNA network. Supplementary Table 2. Negatively coexpressed lncRNA-mRNA network. [file 6577942.f1.zip]

Archive with 2 entries (2 files):
- 6577942.f1/Supplementary Table 1.pdf
- 6577942.f1/Supplementary Table 2.pdf
